# Supplementary material for: Nutritional Calcium Supply Dependent Calcium Balance, Bone Calcification and Calcium Isotope Ratios in Rats
Source: MDPI journal article supplement (doi:10.3390/ijms23147796), 2022-07-14
Supplement: s1 [file s1]

## Supplements

### *Supplemental Tables*

**Table S1.** Serum Ca, phosphate, creatinine and alkaline phosphatase were measured weekly in group 1 (n=2-5), group 2 (n=1-5) and group 3 (n=2-4 animals per measurement). Serum Ca, phosphate creatinine, and alkaline phosphatase were in the normal range for rats throughout [49].

|                            | Baseline<br>(Group 1) | Standard-Ca-diet<br>(Group 2) | Low-Ca-diet<br>(Group 3) |
|----------------------------|-----------------------|-------------------------------|--------------------------|
| Calcium (mmol/l)           | 2.84 ± 0.03           | 2.78 ± 0.12                   | 2.70 ± 0.10              |
| Phosphate (mmol/l)         | 3.9 ± 0.4             | 2.69 ± 0.6                    | 2.9 ± 0.3                |
| Creatinine (mg/dl)         | 0.42 ± 0.10           | 0.27 ± 0.10                   | 0.24 ± 0.06              |
| Alkaline phosphatase (U/l) | 472 ± 57              | 397 ± 150                     | 400 ± 102                |

**Table S2.** Tibia  $\mu$ CT studies were performed after 2 weeks of standard-Ca-diet (0.5% Ca; baseline group 1), after a total of six weeks of standard-Ca-diet (group 2) and in rats after two weeks of standard-Ca-diet followed by 4 weeks of a low-Ca-diet (0.25%; group 3).

| Right tibia                                                                       |                                    | Baseline<br>Week 2<br>(Group 1; n=10) | Standard-Ca-diet<br>Week 6<br>(Group 2; n=19) | Low-Ca-diet<br>Week 6<br>(Group 3; n=20) | p-value <sup>a</sup> |
|-----------------------------------------------------------------------------------|------------------------------------|---------------------------------------|-----------------------------------------------|------------------------------------------|----------------------|
| Volume<br>(mm <sup>3</sup> )                                                      | Total bone                         | 301 $\pm$ 20                          | 406 $\pm$ 22                                  | 373 $\pm$ 24                             | .0002                |
|                                                                                   | $\Delta$ tibia volume <sup>b</sup> |                                       | 105 $\pm$ 22                                  | 72.0 $\pm$ 24                            | .0002                |
|                                                                                   | Cortical bone                      | 201 $\pm$ 12                          | 305 $\pm$ 14                                  | 275 $\pm$ 15                             | <.0001               |
|                                                                                   | Cancellous bone                    | 100 $\pm$ 15                          | 101 $\pm$ 9.6                                 | 98 $\pm$ 11                              | .41                  |
|                                                                                   | Diaphysis <sup>c</sup>             | 12 $\pm$ 0.4                          | 17.9 $\pm$ 1.3                                | 16.9 $\pm$ 0.7                           | .004                 |
|                                                                                   | Metaphysis <sup>c</sup>            | 44 $\pm$ 4.2                          | 30.4 $\pm$ 2.4                                | 25.5 $\pm$ 3.4                           | <.0001               |
|                                                                                   | Epiphysis <sup>c</sup>             | 7.6 $\pm$ 1.6                         | 14.1 $\pm$ 2.8                                | 13.1 $\pm$ 1.8                           | .18                  |
| Bone mineral<br>density<br>(HU)                                                   | Total bone HU                      | 3791 $\pm$ 108                        | 4043 $\pm$ 64                                 | 3992 $\pm$ 73                            | .03                  |
|                                                                                   | $\Delta$ HU <sup>b</sup>           |                                       | 252 $\pm$ 64                                  | 201 $\pm$ 73                             | .03                  |
|                                                                                   | Cortical bone<br>HU                | 2819 $\pm$ 108                        | 3086 $\pm$ 64                                 | 3041 $\pm$ 71                            | .05                  |
|                                                                                   | Cancellous bone<br>HU              | 972 $\pm$ 7.0                         | 957 $\pm$ 5.5                                 | 951 $\pm$ 5.1                            | .002                 |
|                                                                                   | Diaphysis HU <sup>c</sup>          | 3655 $\pm$ 162                        | 3667 $\pm$ 122                                | 3581 $\pm$ 101                           | .02                  |
|                                                                                   | Metaphysis HU                      | 2586 $\pm$ 53                         | 2945 $\pm$ 52                                 | 2875 $\pm$ 67                            | .001                 |
|                                                                                   | Epiphysis HU <sup>c</sup>          | 2714 $\pm$ 59                         | 2885 $\pm$ 64                                 | 2793 $\pm$ 50                            | <.0001               |
| $\Delta$ Hounsfield Units $\times$ tibia volume<br>(HU $\times$ mm <sup>3</sup> ) |                                    |                                       | 101341 $\pm$ 21862                            | 74059 $\pm$ 24955                        | .001                 |

a = G2 vs. G3, t-test; b = in the period of week 3-6; c = cortical + cancellous bone

**Table S3.** In group 1, six additional female rats were compared to the 12 male animals. All animals received 0.5% Ca diet for 2 weeks. Dietary food and thus Ca intake were reduced in female rats entailing an also reduced net body Ca uptake. None of the Ca isotope ratios in the female rats differed significantly from the male animals of group 1.

|                               |                                   | Week 1/2        |             | p-value <sup>a</sup> |             |             |                      |
|-------------------------------|-----------------------------------|-----------------|-------------|----------------------|-------------|-------------|----------------------|
|                               |                                   | female          | male        |                      |             |             |                      |
| Ca balance                    | Food intake (g/day)               | 15.4 ± 0.4      | 22.1 ± 1.0  | .001                 |             |             |                      |
|                               | Dietary Ca intake (mg/day)        | 76.8 ± 1.8      | 111 ± 5.0   | .001                 |             |             |                      |
|                               | Fluid intake (ml/day)             | 22.9 ± 0.8      | 32.2 ± 1.2  | <.0001               |             |             |                      |
|                               | Fluid Ca intake (mg/day)          | 2.5 ± 0.1       | 3.5 ± 0.1   | <.0001               |             |             |                      |
|                               | Feces (g/day)                     | 1.1 ± 1.1       | 2.8 ± 0.7   | .001                 |             |             |                      |
|                               | Fecal Ca loss (mg/day)            | 12.4 ± 6.7      | 12.9 ± 6.4  | .25                  |             |             |                      |
|                               | Intestinal Ca absorption (%)      | 90.5 ± 3.9      | 88.6 ± 5.6  | .65                  |             |             |                      |
|                               | Intestinal Ca absorption (mg/day) | 71.5 ± 3.1      | 100.9 ± 6.4 | .002                 |             |             |                      |
|                               | Urine excretion (ml/day)          | 8.1 ± 4.0       | 8.5 ± 3.2   | .83                  |             |             |                      |
|                               | Urine Ca excretion (mg/day)       | 1.0 ± 0.7       | 0.7 ± 0.4   | .74                  |             |             |                      |
| Net body Ca uptake (mg / day) |                                   | 70.6 ± 2.7      | 100.4 ± 6.6 | .002                 |             |             |                      |
| μCT                           | Tibia                             | 249 ± 13        | 301 ± 20    | <.0001               |             |             |                      |
|                               | Volume (mm <sup>3</sup> )         | Cortical bone   | 177 ± 8     | 201 ± 12             | <.0001      |             |                      |
|                               |                                   | Cancellous bone | 71 ± 6      | 100 ± 15             | <.0001      |             |                      |
|                               | Tibia                             | 3977 ± 21       | 3791 ± 108  | .001                 |             |             |                      |
|                               | Bone density (HU)                 | Cortical bone   | 3004 ± 21   | 2819 ± 108           | .001        |             |                      |
|                               |                                   | Cancellous bone | 973 ± 2     | 972 ± 7              | .68         |             |                      |
| δ <sup>44/42</sup> Ca (‰)     | Femur                             | 0.11 ± 0.04     | 0.15 ± 0.05 | .34                  |             |             |                      |
|                               | Lower ribs                        | 0.14 ± 0.10     | 0.13 ± 0.05 | .86                  |             |             |                      |
|                               | Tibia: diaphysis                  | 0.14 ± 0.05     | 0.18 ± 0.06 | .14                  |             |             |                      |
|                               | Tibia: metaphysis                 | 0.28 ± 0.05     | 0.27 ± 0.07 | .94                  |             |             |                      |
|                               | Tibia: epiphysis                  | 0.20 ± 0.06     | 0.26 ± 0.04 | .11                  |             |             |                      |
|                               |                                   |                 |             |                      |             |             |                      |
|                               |                                   | Week 1          |             | p-value <sup>a</sup> | Week 2      |             | p-value <sup>a</sup> |
|                               |                                   | female          | male        |                      | female      | male        |                      |
| Serum Ca (mmol/l)             | Serum                             | 0.47 ± 0.07     | 0.52 ± 0.03 | .06                  | 0.56 ± 0.03 | 0.58 ± 0.05 | .54                  |
|                               | Feces                             | 0.78 ± 0.06     | 0.88 ± 0.17 | .39                  | 0.95 ± 0.11 | 1.04 ± 0.12 | .38                  |
|                               | Urine                             | 1.19 ± 0.51     | 1.16 ± 0.54 | .92                  | 1.58 ± 0.21 | 1.54 ± 0.28 | .84                  |
| Serum Ca (mmol/l)             |                                   | 3.06 ± 2.36     | 2.86 ± 0.73 | .83                  | 2.67 ± 0.27 | 2.82 ± 0.36 | .87                  |

a = t-test

Supplemental Figures

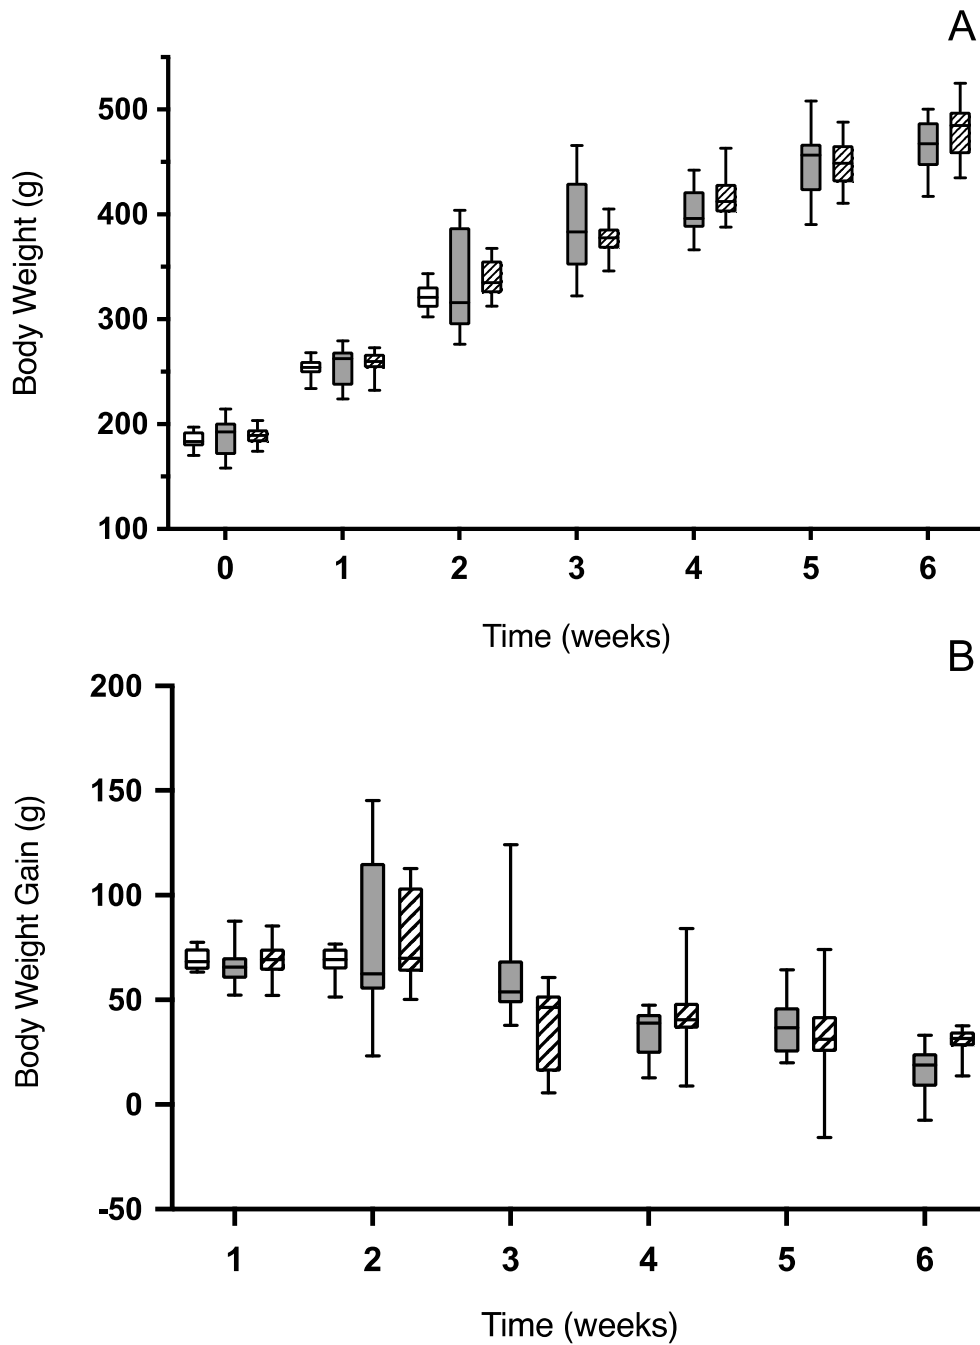

**Figure S1.** Body weight and body weight gain Body weight (A) and weekly body weight gain (B) was similar in animals of group 1 (empty boxes), group 2 on standard-Ca-diet (gray boxes) and group 3 on low-Ca-diet (hatched boxes) throughout the study.

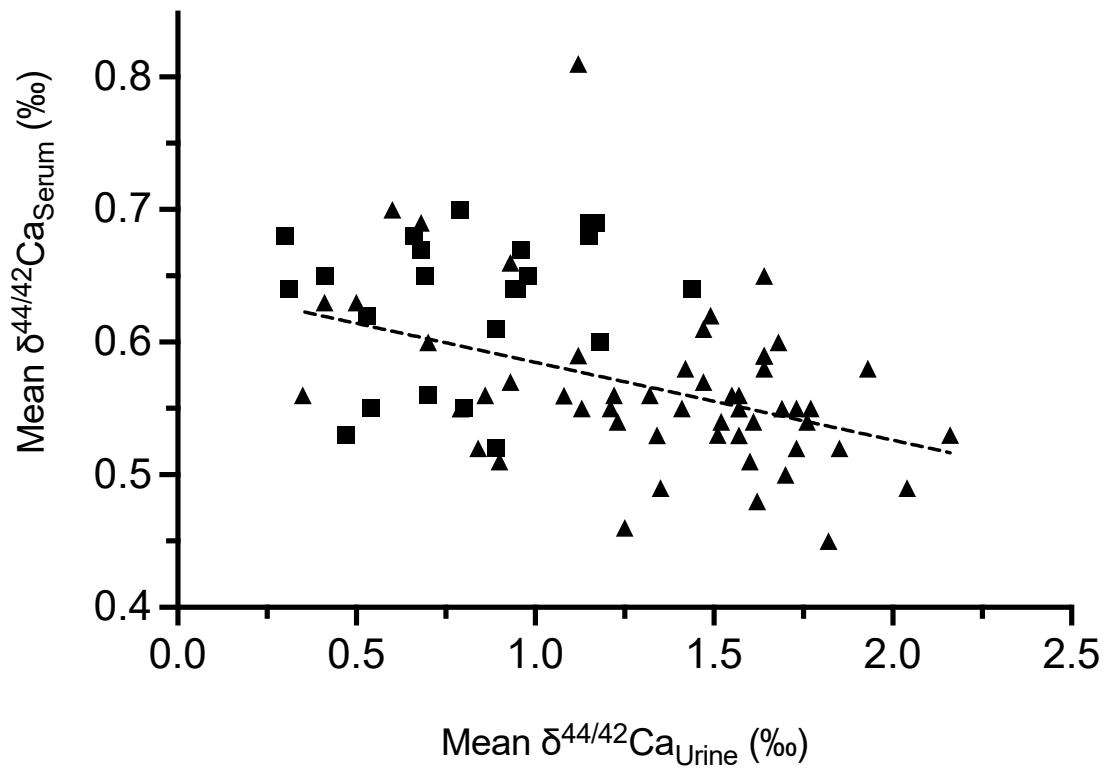

**Figure S2.** Mean  $\delta^{44/42}\text{Ca}_{\text{Urine}}$  and  $\delta^{44/42}\text{Ca}_{\text{Serum}}$  in rats on low and standard-Ca-diet Two weeks means of  $\delta^{44/42}\text{Ca}_{\text{Urine}}$  in rats on standard-diet (triangles) and low-Ca-diet (squares) are shown relative to the respective mean  $\delta^{44/42}\text{Ca}_{\text{Serum}}$ . In animals on standard-Ca-diet  $\delta^{44/42}\text{Ca}_{\text{Urine}}$  inversely correlated with  $\delta^{44/42}\text{Ca}_{\text{Serum}}$  ( $r=-0.41$ ,  $p=0.003$ ;  $n=53$ ) but not in animals on low-Ca-diet ( $r=0.18$ ,  $p=0.39$ ;  $n=23$ ).
